# Supplementary material for: Priority-setting, the Indian way
Source: PubMed Central journal article supplement (PMC6237104; doi:10.7189/jogh.08.020311), 2018-12
Supplement: jogh-08-020311-s001.pdf [file jogh-08-020311-s001.pdf]

## Online Supplementary Document

Rao et al. Priority-setting, the Indian way

**J Glob Health 2018;8:020311**

### Supplementary References:

- [s21] Kumar M, Ebrahim S, Taylor FC, et al. Health technology assessment in India: the potential for improved healthcare decision-making. *Natl. Med. J. India.* 2014;27:159–163.
- [s22] Drummond M, Jonsson B, Rutten F. The role of economic evaluation in the pricing and reimbursement of medicines. *Health Policy (New. York).* 1997;40.
- [s23] NITI Aayog. *Healthy States, Progressive India: Report on the Ranks of States and Union Territories.* 2018.
- [s24] National Health Mission (Government of India). *Standard Treatment Guidelines [Internet].* [cited 2018 Mar 20]. Available from: <http://www.nhm.gov.in/nrhm-instate/520-standard-treatment-guidelines.html>.
- [s25] Banta D. The development of health technology assessment. *Health Policy (New. York).* 2018;63:121–132.
- [s26] *Quality and accreditation in health care services: A global review.* World Health Organization, Geneva; 2003.
- [s27] International Network of Agencies for Health Technology Assessment (INAHTA). *Ethical Issues in HTA [Internet].* [cited 2018 Mar 21]. Available from: <http://www.inahta.org/hta-tools-resources/ethics/>.
- [s28] WHO Consultative Group on Equity and Universal Health Coverage. *Making fair choices on the path to universal health coverage: Final report of the WHO Consultative Group on Equity and Universal Health Coverage.* *Health Econ. Policy. Law.* 2014;1–7.
- [s29] Balarajan Y, Selvaraj S, Subramanian S V. Health care and equity in India. *Lancet.* 2011;377:505–515.

- [s30] Ravindran S, Gaitonde R, Evidence R. Health Inequities in India. 2018.
- [s31] Downey L, Rao N, Guinness L, et al. Identification of publicly available data sources to inform the conduct of Health Technology Assessment in India [version 1; referees: 1 approved]. F1000Research. 2018;7.
- [s32] Prinja S, Chauhan AS, Angell B, et al. A Systematic Review of the State of Economic Evaluation for Health Care in India. Appl. Health Econ. Health Policy. 2015;13:595–613.
- [s33] Dukhanin V, Searle A, Zwerling A, et al. Integrating social justice concerns into economic evaluation for healthcare and public health: A systematic review. Soc. Sci. Med. 2018;198:27–35.
